# Supplementary material for: NCAPG as a novel prognostic biomarker in numerous cancers: a meta-analysis and bioinformatics analysis
Source: publisher site journal article supplement (doi:10.18632/aging.204621), 2023-03-29
Supplement: Supplementary file [file aging-v15i7-204621-supplementary-material-SD1.pdf]

SUPPLEMENTARY FIGURES

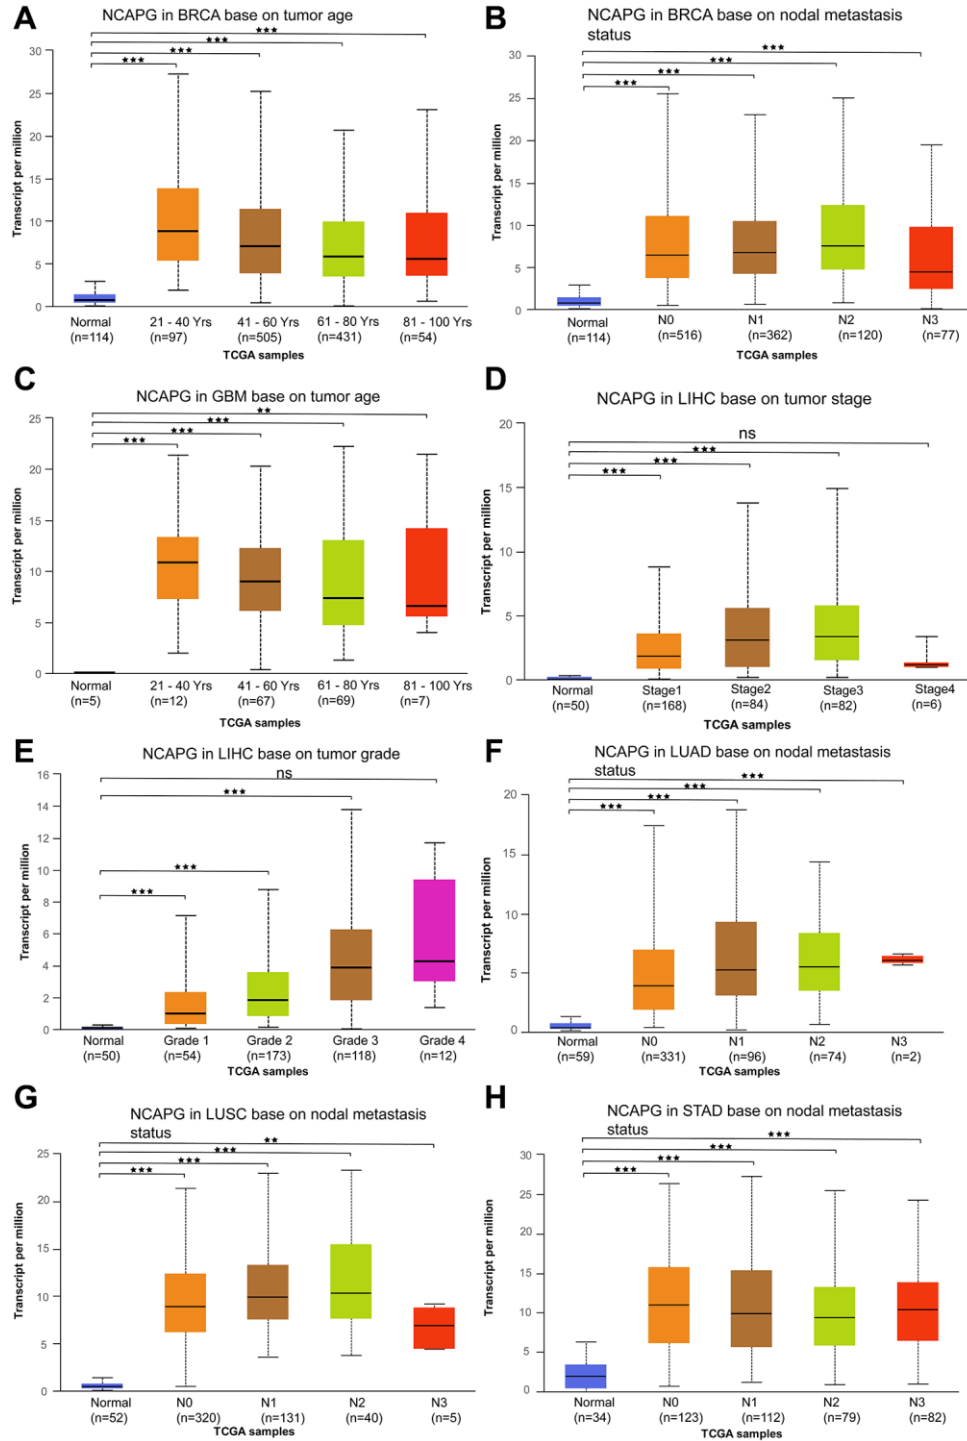

**Supplementary Figure 1.** NCAPG in BRCA base on tumor age (A), NCAPG in BRCA base on nodal metastasis status (B), NCAPG in GBM base on tumor age (C), NCAPG in LIHC base on tumor age (D), NCAPG in LIHC base on tumor grade (E), NCAPG in BRCA base on nodal metastasis status (F), NCAPG in LUSC base on nodal metastasis status (G), NCAPG in STAD base on nodal metastasis status (H).

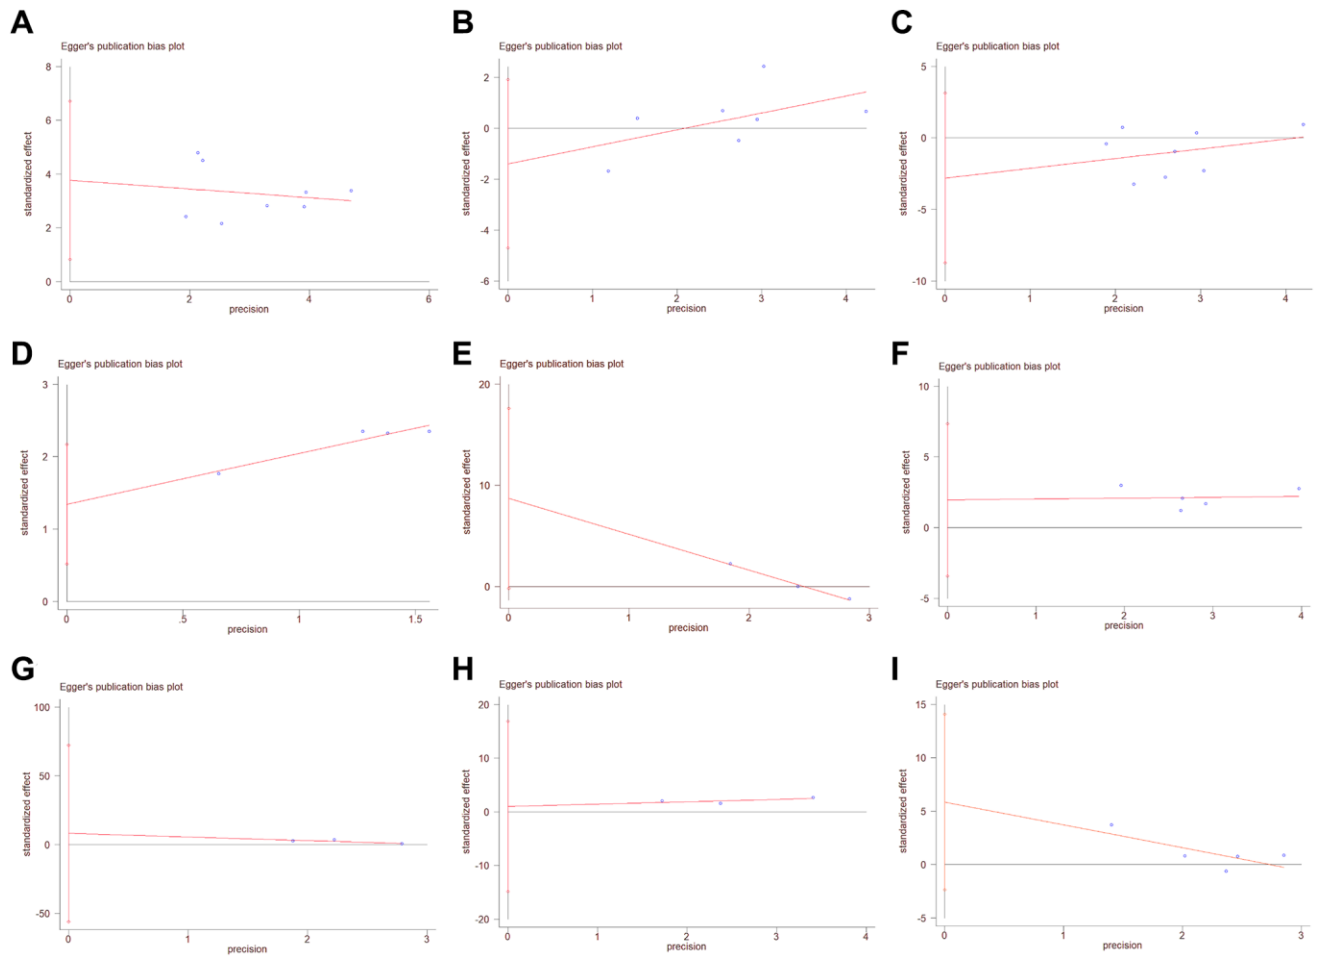

**Supplementary Figure 2. Egger's tests for publication bias.** (A) OS, (B) gender, (C) age, (D) distant metastasis, (E) differentiation, (F) lymph node metastasis, (G) relapse, (H) clinical stage, (I) T classification.

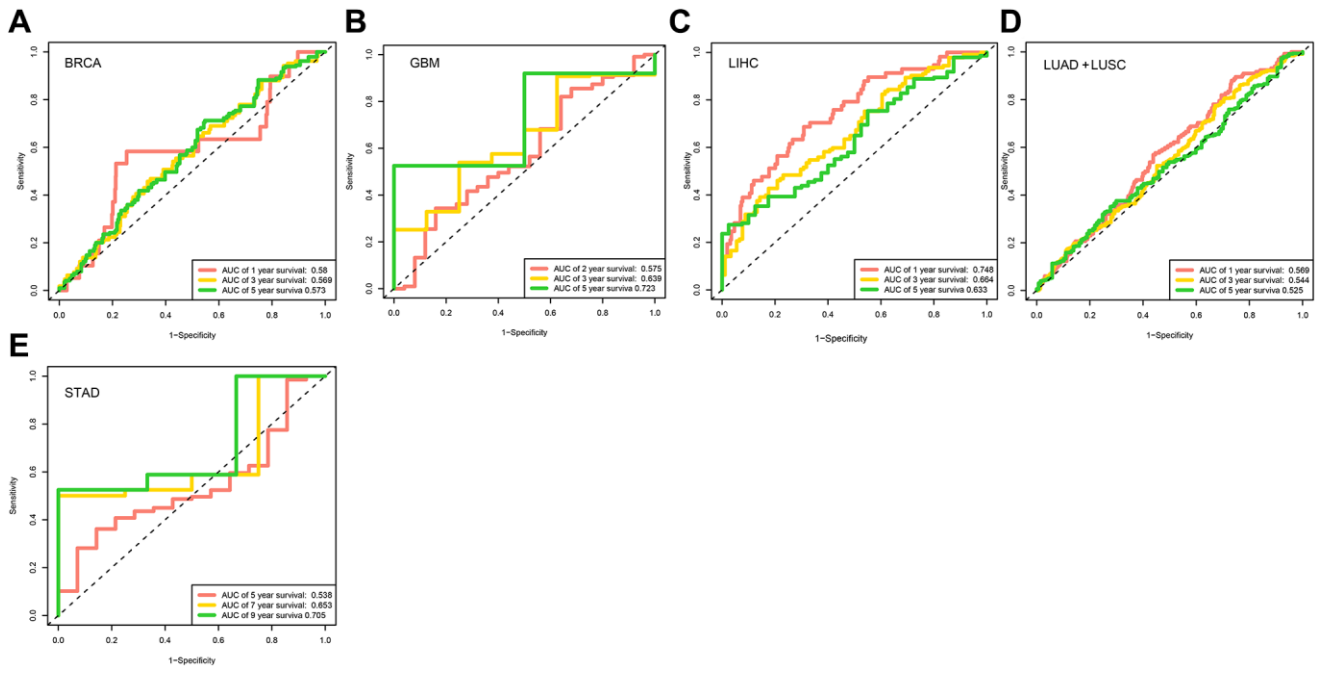

**Supplementary Figure 3.** (A) BRCA's time ROC curve, (B) GBM's time ROC curve, (C) LIHC's time ROC curve, (D) LUAD and LUSC's time ROC curve, (E) STAD's time ROC curve.
